# Supplementary material for: Selection of a suitable photosynthetically active microalgae strain for the co-cultivation with mammalian cells
Source: PubMed Central journal article supplement (PMC9528974; doi:10.3389/fbioe.2022.994134), 2022-09-19
Supplement: DataSheet1.pdf [file DataSheet1.pdf]

## Supplementary Material

### 1.1 Supplementary Figures

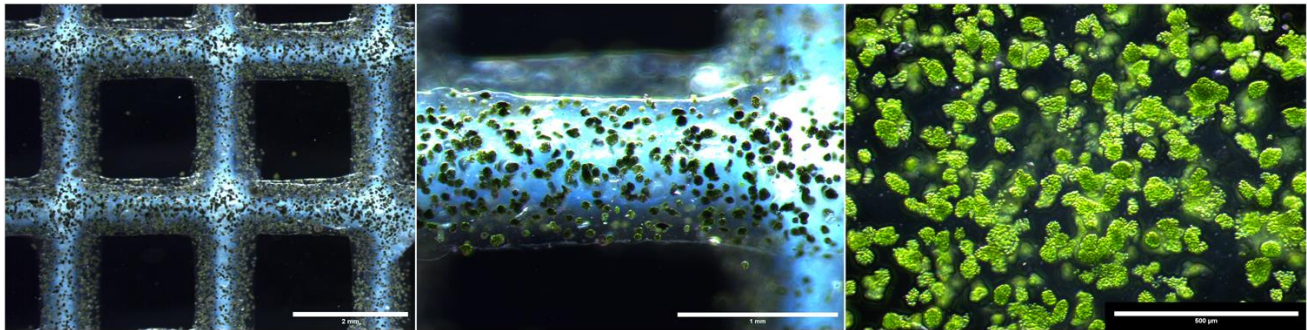

**Supplementary Figure 1.** Images of bioprinted microalgae under a reflected-light microscope.

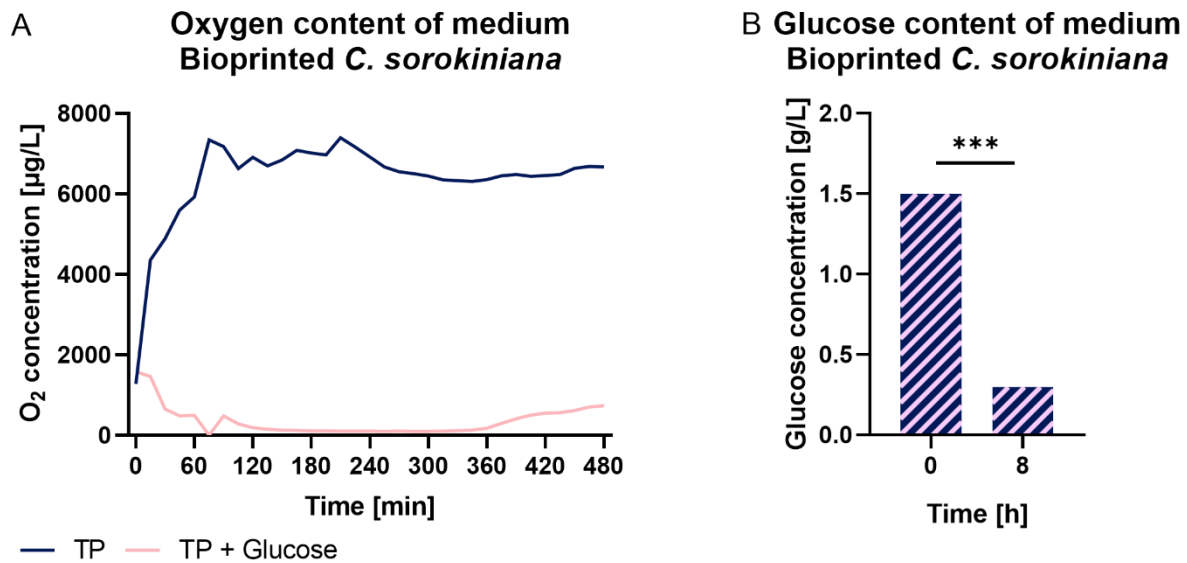

**Supplementary Figure 2.** Oxygen content over time (A) and glucose concentration (B) of 3D bioprinted *C. sorokiniana*. Depicted are 480 min of cultivation under hypoxic conditions (1 % oxygen concentration) in TP medium with and without 7.1 mM glucose under red illumination ( $150 \mu\text{mol}/\text{m}^2\text{s}$ ) at  $37^\circ\text{C}$ . Depicted is  $n = 1$  (A), mean  $\pm$  range for (B) with  $n = 2$ ; \*\*\* $p < 0.001$ .
